# Supplementary material
Source: PubMed Central journal article supplement (PMC8187466)
Supplement: NIHMS1654754-supplement-Sup_fig_S1.pdf [file NIHMS1654754-supplement-Sup_fig_S1.pdf]

## Individual Recruitment Site Analyses

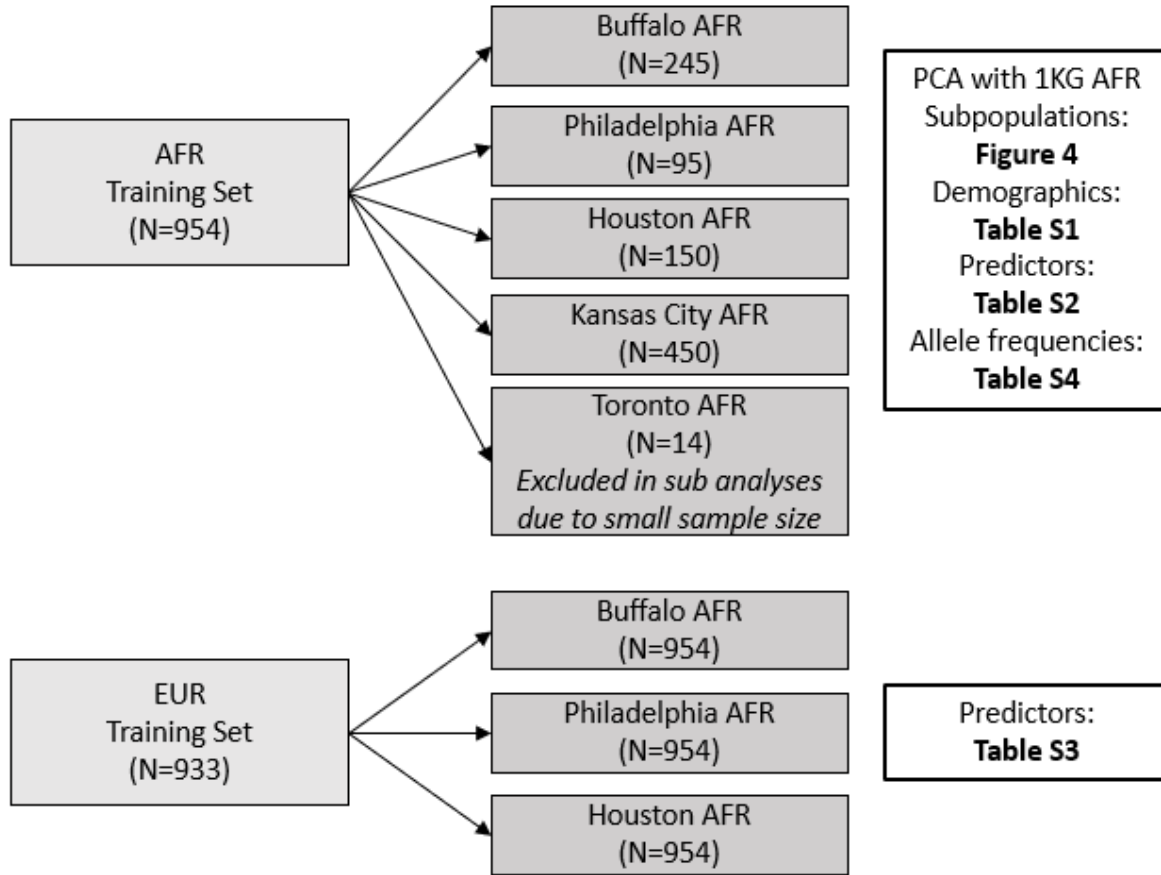

**Figure S1.** Flowchart for the sub analyses performed between the individual geographical recruitment sites in the training set.
