# Supplementary material
Source: PubMed Central journal article supplement (PMC8187466)
Supplement: NIHMS1654754-supplement-Sup_fig_S2.pdf [file NIHMS1654754-supplement-Sup_fig_S2.pdf]

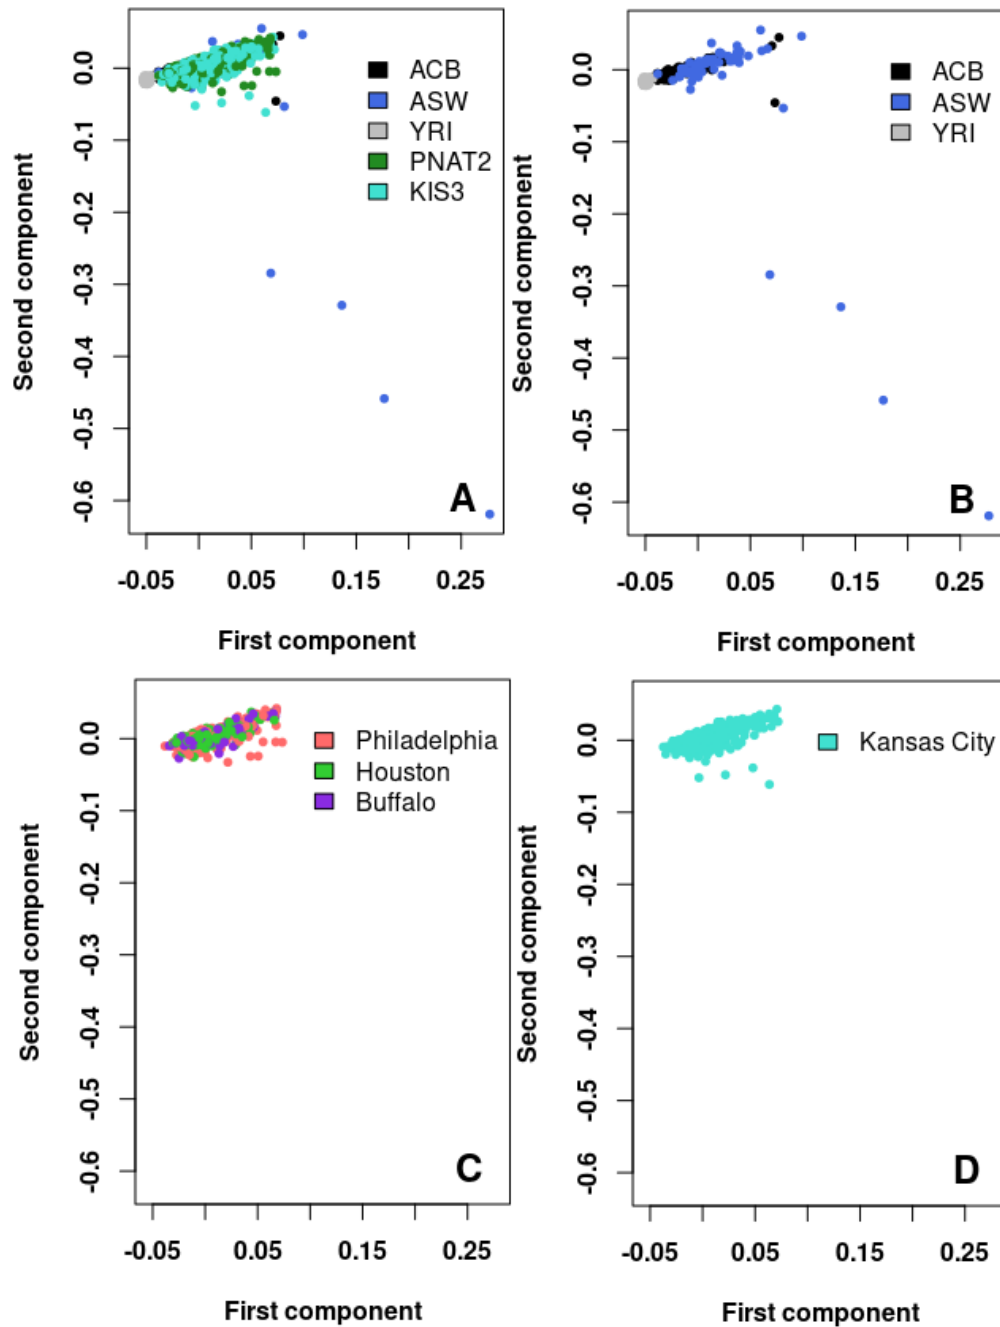

**Figure S2.** Principal component analyses showing fine AFR population substructure. Principal components were computed from merging selected similar 1KG AFR subpopulations (ACB, ASW, and YRI) and the training set (PNAT2+KIS3 AFR) samples. A) 1KG AFR subpopulations and training set (PNAT2+KIS3 AFR) participants plotted. B) 1KG AFR subpopulations plotted only. C) PNAT2 participants split by geographic recruitment sites plotted only. D) KIS3 participants plotted only. (ACB: 1KG African Caribbeans; ASW: 1KG Southwest Americans; YRI: 1KG Yoruba). Note: The PNAT2 Toronto site was excluded from the analyses in this Figure to the small sample size ( $N=14$ )
