# Supplementary material
Source: PubMed Central journal article supplement (PMC8187466)
Supplement: NIHMS1654754-supplement-Sup_fig_S5.pdf [file NIHMS1654754-supplement-Sup_fig_S5.pdf]

## Clinical Analyses

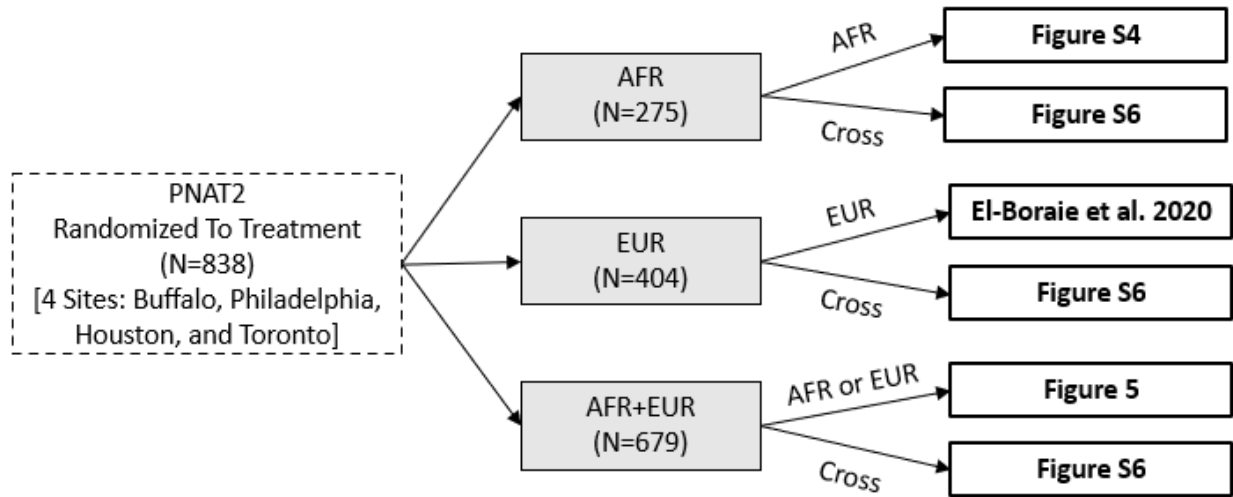

**Figure S5.** Flowchart for the variations of clinical smoking cessation analyses performed using the different ancestral populations (AFR, EUR, or both) and the different wGRS (ancestry-specific or cross-ancestry).
