# Supplementary material
Source: PubMed Central journal article supplement (PMC8187466)
Supplement: NIHMS1654754-supplement-Sup_fig_S6.pdf [file NIHMS1654754-supplement-Sup_fig_S6.pdf]

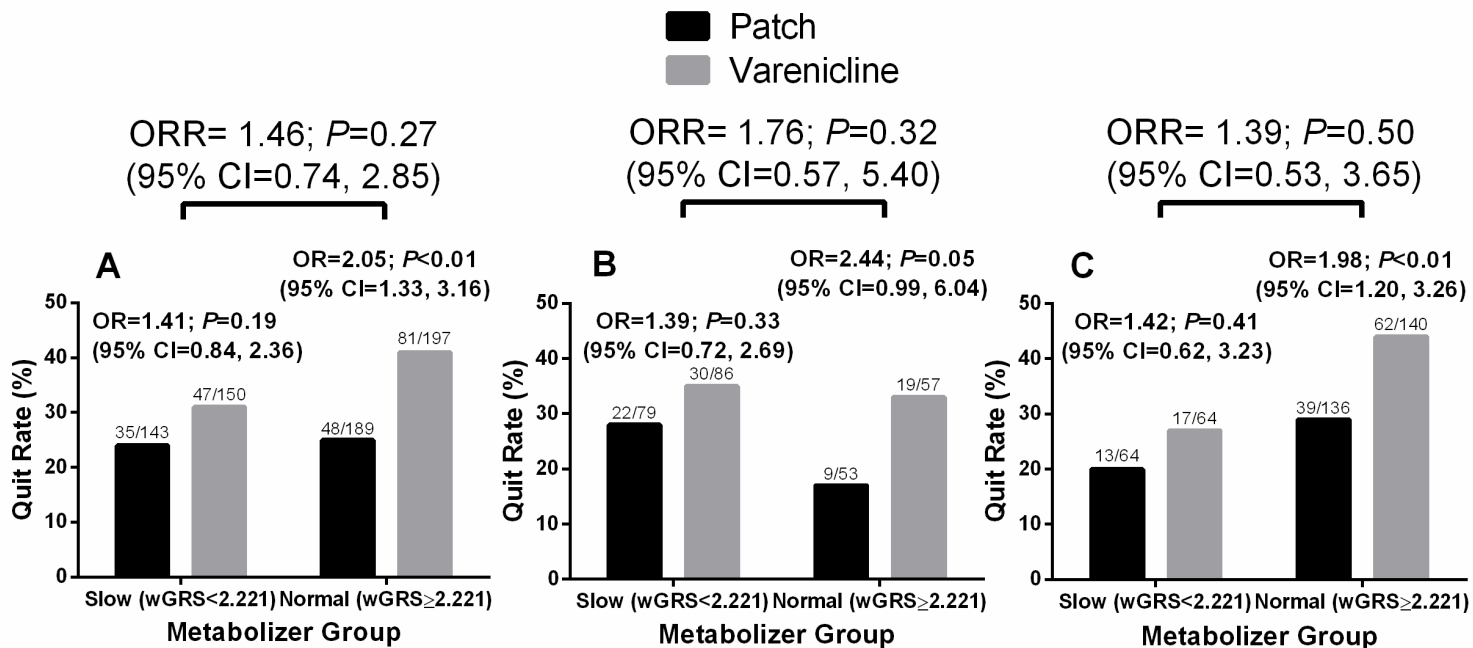

**Figure S6.** End-of-treatment quit rates by treatment group and metabolizer group: Cross-ancestry wGRS tested. Odds ratios (OR) with 95% confidence intervals (CI) comparing the efficacy of varenicline versus the nicotine patch. Metabolizer-by-treatment interaction effects on end-of-treatment quit rates evaluated by the ratio of odds ratios (ORR) with 95% CI. Stratification by the cross-ancestry wGRS in the (A) merged EUR and AFR subset of the varenicline and nicotine patch treatment arms ( $N=679$ ), (B) AFR subset ( $N=275$ ), and (C) EUR subset ( $N=404$ ) (slow:  $wGRS < 2.221$ , normal:  $wGRS \geq 2.221$ ).
