# Supplementary material
Source: PubMed Central journal article supplement (PMC8187466)
Supplement: NIHMS1654754-supplement-Sup_fig_S7.pdf [file NIHMS1654754-supplement-Sup_fig_S7.pdf]

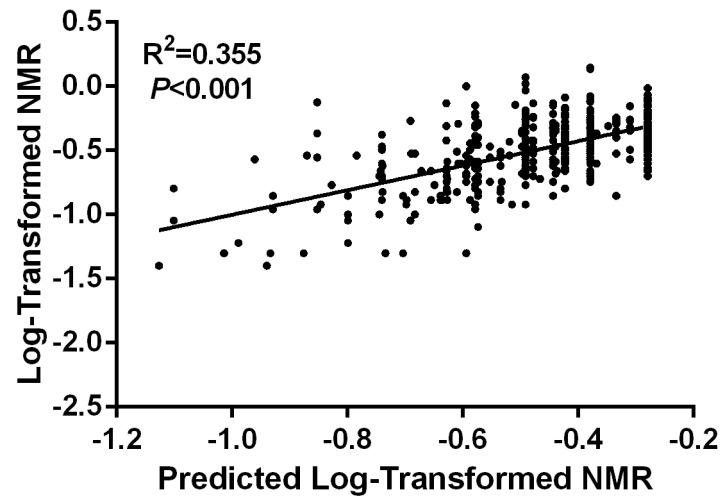

**Figure S7.** Linear regression analyses of the relationship between the predicted log-transformed NMR and log-transformed NMR in the replication set ( $N=412$ ; combined AFR and EUR populations).

Predicted log-NMR in AFR =  $1.0502$  (AFR wGRS) -  $2.7042$  – from line of best fit in (**Figure 2A**)

Predicted log-NMR in EUR =  $0.684$  (EUR wGRS) -  $1.9417$  – from line of best fit in previously published report of the EUR wGRS (**Figure 2B**)(10)
