# Supplementary material
Source: PubMed Central journal article supplement (PMC8187466)
Supplement: NIHMS1654754-supplement-Sup_fig_S8.pdf [file NIHMS1654754-supplement-Sup_fig_S8.pdf]

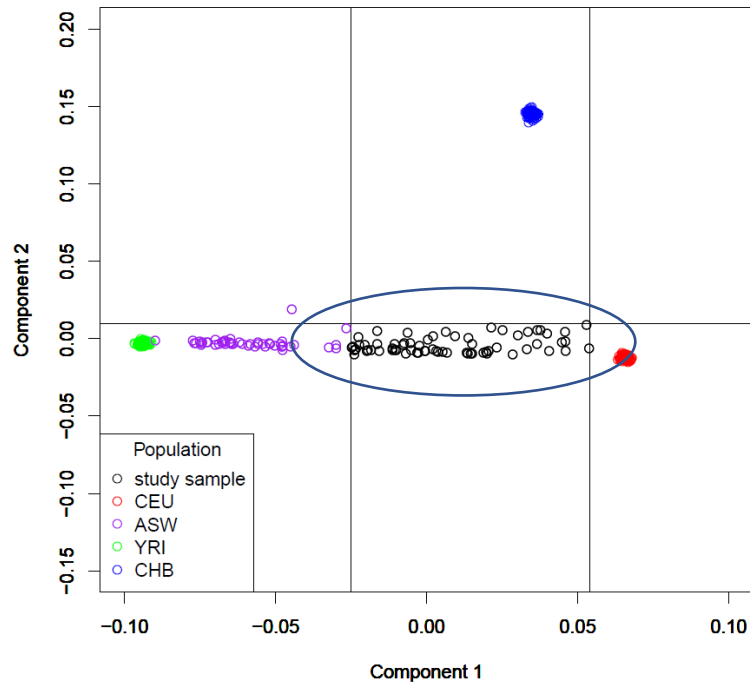

**Figure S8.** Principal component analysis plot of the HapMap3 reference populations and the admixed AFR-EUR participants in the PNAT2+KIS3 clinical trials. Plotted principal components were computed from merging the HapMap3 reference populations and all samples from the PNAT2+KIS3 trials. The admixed participants (study sample; black  $N=68$ ) were determined through ancestry clustering to the reference HapMap3 project based on lying on the cline between the CEU (Utah residents with European ancestry; red) and the ASW (African ancestry in Southwest USA; purple) or YRI (Yoruba in Ibadan, Nigeria; green) subpopulations. The following PC cut-points (represented by the black lines) were used to determine the admixed study sample:  $-0.025 < PC1 < 0.054$  &  $PC2 \leq 0.01$ .
